# Supplementary material for: Human TERT Promoter Mutations in Atypical and Anaplastic Meningiomas
Source: MDPI journal article supplement (doi:10.3390/diagnostics11091624), 2021-09-06
Supplement: s1 [file s1]

**Supplementary Table S1.** Immunophenotypic and molecular profile of the cases selected for the study of the intra-tumour heterogeneity classified according to the WHO 2016 guidelines.

| Case # | Morphologic variant | Brain parenchyma infiltration | Mitotic index | Ki-67 LI (%) | WHO grading < 2016 | WHO grading > 2016 | ATRX immunoreactivity | <i>pTERT</i> mutation status |
|--------|---------------------|-------------------------------|---------------|--------------|--------------------|--------------------|-----------------------|------------------------------|
| 14     | Atypical            | +                             | 4             | 18.3         | III                | II                 | ++                    | WT                           |
| 15     | Atypical            | -                             | 8             | 26.3         | III                | II                 | -                     | WT                           |
| 16     | Atypical            | +                             | 6             | 35.8         | III                | II                 | ++                    | WT                           |
| 17     | Atypical            | +                             | 8             | 10           | III                | II                 | ++                    | WT                           |
| 18     | Atypical            | -                             | 7             | 10.8         | II                 | II                 | ++                    | WT                           |
| 19     | Atypical            | -                             | 4             | 12.9         | II                 | II                 | ++                    | WT                           |
| 20     | Atypical            | +                             | 0             | 4.7          | II                 | II                 | ++                    | WT                           |
| 21     | Clear cell          | +                             | < 4           | 17           | II                 | II                 | ++                    | WT                           |
| 7      | Anaplastic          | +                             | 28            | 36           | III                | III                | ++                    | C250T                        |
| 22     | Anaplastic          | +                             | 11            | 33.9         | III                | III                | ++                    | WT                           |
| 23     | Anaplastic          | -                             | 20            | 46.3         | III                | III                | ++                    | WT                           |
| 24     | Anaplastic          | -                             | 20            | 48.8         | III                | III                | ++                    | WT                           |

Abbreviations: LI, labelling index; WHO, World Health Organization; ATRX, alpha-thalassemia/mental retardation syndrome X-linked; TERT, telomerase reverse transcriptase; WT, wild type.

**Supplementary Table S2.** Phenotypic and genotypic features of the 25 selected tumour areas.

| Heterogeneity Criteria             | Case # | Area  | Dissection | Morphologic variant / WHO Grade | Brain Infiltration | Ki-67 LI (%) | ATRX Immunoreactivity |
|------------------------------------|--------|-------|------------|---------------------------------|--------------------|--------------|-----------------------|
| Morphologic Variant / WHO grade    | 21     | A     | Macro      | Clear cell                      | -                  | 11.5         | ++                    |
|                                    |        | B     | Macro      | Papillary                       | -                  | 4.9          | ++                    |
|                                    |        | C     | LMD        | II                              | +                  | 13.17        | +                     |
|                                    | 22     | A     | Macro      | II                              | +                  | 14.3         | +                     |
|                                    |        | B     | Macro      | III                             | -                  | 33.9         | ++                    |
|                                    | 24     | A     | LMD        | I                               | -                  | 3.2          | +                     |
| B                                  |        | Macro | III        | -                               | 48.8               | ++           |                       |
| Ki-67 LI                           | 14     | A     | Macro      | II                              | -                  | 7.1          | +                     |
|                                    |        | B     | Macro      | II                              | -                  | 18.5         | +                     |
|                                    | 7      | A     | Macro      | III                             | -                  | 19.3         | ++                    |
|                                    |        | B     | Macro      | III                             | -                  | 36           | ++                    |
|                                    | 18     | A     | Macro      | II                              | -                  | 1.6          | ++                    |
|                                    |        | B     | LMD        | II                              | -                  | 7.2          | ++                    |
|                                    | 19     | A     | Macro      | II                              | -                  | 5.3          | +                     |
|                                    |        | B     | LMD        | II                              | -                  | 9            | ++                    |
|                                    | 23     | A     | Macro      | III                             | -                  | 19           | +                     |
|                                    |        | B     | Macro      | III                             | -                  | 46.3         | ++                    |
| Infiltration into brain parenchyma | 15     | A     | LMD        | II                              | -                  | 26.3         | -                     |
|                                    |        | B     | Macro      | II                              | +                  | 13           | -                     |
|                                    | 16     | A     | Macro      | II                              | -                  | 25.8         | +                     |
|                                    |        | B     | Macro      | II                              | +                  | 30           | +                     |
|                                    | 17     | A     | Macro      | II                              | -                  | 2.8          | +                     |
|                                    |        | B     | Micro      | II                              | +                  | 10           | ++                    |
|                                    | 20     | A     | Macro      | II                              | -                  | 2.7          | +                     |
| B                                  |        | Macro | II         | +                               | 4.7                | ++           |                       |

Abbreviations: WHO, World Health Organization; LI, labelling index; Macro, manual macrodissection; LMD, laser microdissection; ATRX, alpha-thalassemia/mental retardation syndrome X-linked. \*Infiltration into brain parenchyma with perivascular cuffing.

**Supplementary Table S3.** PCR and Sanger sequencing threshold as function of genomic DNA quantification for the 25 selected tumour areas.

| Heterogeneity criteria                    | Case # | Area | Surface (µm <sup>2</sup> ) | Whitdrawals / thickness | Quantification |                   |                   | pTERT mutation status |             |
|-------------------------------------------|--------|------|----------------------------|-------------------------|----------------|-------------------|-------------------|-----------------------|-------------|
|                                           |        |      |                            |                         | DNA (ng/µl)    | <u>260</u><br>280 | <u>260</u><br>230 | Primary tumour        | Tumour area |
| <b>Morphologic variant / WHO grade</b>    | 21     | A    | Macro                      | 13 (5-µm)               | 44.3           | 2.13              | 0.25              | WT                    | WT          |
|                                           |        | B    | Macro                      | 13 (5-µm)               | 270.7          | 1.99              | 0.91              |                       | WT          |
|                                           |        | C    | 3,026,858                  | 9                       | 9.6            | 6.79              | 0.05              |                       | NA          |
|                                           | 22     | A    | Macro                      | 10 (5-µm)               | 210.9          | 1.94              | 0.85              | WT                    | WT          |
|                                           |        | B    | Macro                      | 13 (5-µm)               | 384.2          | 1.94              | 1.15              |                       | WT          |
|                                           | 24     | A    | 5,104,412                  | 12                      | 9.5            | 4.27              | 0.06              | WT                    | WT          |
|                                           |        | B    | Macro                      | 13 (5-µm)               | 818.7          | 1.87              | 1.45              |                       | WT          |
| <b>Ki-67 LI</b>                           | 14     | A    | Macro                      | 15 (5-µm)               | 252.7          | 2                 | 0.92              | WT                    | WT          |
|                                           |        | B    | Macro                      | 13 (5-µm)               | 108.7          | 1.91              | 0.54              |                       | WT          |
|                                           | 7      | A    | Macro                      | 13 (5-µm)               | 494.6          | 1.91              | 1.28              | C250T                 | C250T       |
|                                           |        | B    | Macro                      | 13 (5-µm)               | 100.4          | 1.97              | 0.49              |                       | WT          |
|                                           | 18     | A    | Macro                      | 10 (5-µm)               | 176.5          | 1.98              | 0.74              | WT                    | WT          |
|                                           |        | B    | 3,845,611.5                | 9                       | 10.4           | 4.94              | 0.06              |                       | WT          |
|                                           | 19     | A    | Macro                      | 20 (5-µm)               | 302.8          | 2                 | 1.03              | WT                    | WT          |
|                                           |        | B    | 4,634,689.2                | 18                      | 8.4            | 47.7              | 0.05              |                       | WT          |
|                                           | 23     | A    | Macro                      | 10 (5-µm)               | 514.5          | 1.91              | 1.34              | WT                    | WT          |
|                                           |        | B    | Macro                      | 13 (5-µm)               | 175.3          | 1.99              | 0.75              |                       | WT          |
| <b>Infiltration into brain parenchyma</b> | 15     | A    | 4,397,022                  | 12                      | 10.3           | 3.93              | 0.05              | WT                    | WT          |
|                                           |        | B    | Macro                      | 13 (5-µm)               | 92.5           | 1.94              | 0.45              |                       | C228T       |
|                                           | 16     | A    | Macro                      | 20 (5-µm)               | 153.3          | 2                 | 0.66              | WT                    | WT          |
|                                           |        | B    | Macro                      | 15 (5-µm)               | 124.1          | 2.02              | 0.56              |                       | WT          |
|                                           | 17     | A    | Macro                      | 10 (5-µm)               | 305.9          | 1.88              | 1.02              | WT                    | WT          |
|                                           |        | B    | 2,555,109.7                | 9                       | 8.1            | 9.87              | 0.05              |                       | WT          |
|                                           | 20     | A    | Macro                      | 10 (5-µm)               | 463.6          | 1.9               | 1.24              | WT                    | WT          |
|                                           |        | B    | Macro                      | 10 (5-µm)               | 670.6          | 1.87              | 1.45              |                       | WT          |

Abbreviations: WHO, World Health Organization; LI, labelling index; Macro, manual macrodissection; LMD, laser microdissection; TERT, telomerase reverse transcriptase; WT, wild type.
